# Supplementary material for: Co–Cu–WSx ball-in-ball nanospheres as high-performance Pt-free bifunctional catalysts in efficient dye-sensitized solar cells and alkaline hydrogen evolution
Source: Royal Society of Chemistry journal article supplement (doi:10.1039/c8ta12558a), 2019-01-01
Supplement: c8ta12558a1.pdf [file c8ta12558a1.pdf]

## Electronic Supplementary Information (ESI)

### **Co-Cu-WS<sub>x</sub> ball-in-ball nanosphere as high-performance Pt-free bifunctional catalyst in efficient dye-sensitized solar cell and alkaline hydrogen evolution**

Xing Qian,\* Hongyu Liu, Jiahui Yang, Huiwen Wang, Jie Huang and Chong Xu

College of Chemical Engineering, Fuzhou University, Xueyuan Road No. 2, Fuzhou 350116, China. E-mail: [xingqian@fzu.edu.cn](mailto:xingqian@fzu.edu.cn). Fax: +86-0591-2286 6244; Tel: +86-0591-2286 5220.

#### **Materials**

Cobalt nitrate hexahydrate (Co(NO<sub>3</sub>)<sub>2</sub>·6H<sub>2</sub>O, AR), copper (II) nitrate trihydrate (Cu(NO<sub>3</sub>)<sub>2</sub>·3H<sub>2</sub>O, AR), ammonium metatungstate hydrate ((NH<sub>4</sub>)<sub>6</sub>H<sub>2</sub>W<sub>12</sub>O<sub>40</sub>·xH<sub>2</sub>O, AR) and thioacetamide (TAA, AR) were obtained from Aladdin Ltd. (China). Ammonium metatungstate hydrate was procured from Aladdin Ltd. Lithium iodide (LiI, ≥ 99.0%), iodine (I<sub>2</sub>, ≥ 99.9%), lithium perchlorate (LiClO<sub>4</sub>, ≥ 99.9%) were purchased from Macklin Ltd. (China). The commercial N719 dye and Pt/C (20 wt%) powder were received from Solaronix Ltd. (Switzerland). The fluorine-doped SnO<sub>2</sub> (FTO) glasses, purchased from Nippon Sheet Glass(15 Ω sq<sup>-1</sup>, Japan), were cleaned with cleanser essence, acetone and ethyl alcohol in sequence and cut into squares of 1.5 cm × 1.5 cm.

#### **Instruments**

The surface morphologies of all samples were observed by a scanning electron microscopy (SEM, S-4800, Hitachi). Powder XRD patterns were carried out on X-ray diffraction (XRD, X'Pert PRO, Cu Kα, λ = 0.15406 nm) for the indication of crystal structure. The microstructures of Co-Ni-MoS<sub>x</sub> YSNs were investigated through a high-resolution transmission electron microscope (HRTEM, TECNAI, G2F20, FEI), equipped with an accessory of energy-dispersive X-ray spectroscopy (EDX). X-ray photoelectron spectroscopy (XPS) analysis was conducted on a VG ESCALAB 250 (Mg Kα, USA) spectrometer to characterize the elemental composition of Co-

Ni-MoS<sub>x</sub> YSNs. The surface area and pore-size distribution were measured by a Micromeritics ASAP-2020.

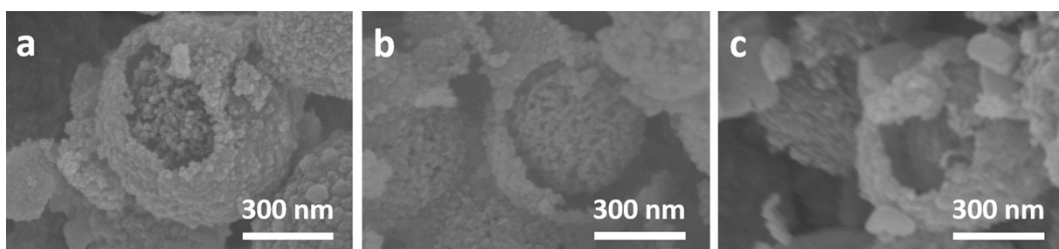

**Fig. S1.** SEM images of (a) cracked Co-Cu-WS<sub>x</sub>, (b) cracked Co-WS<sub>x</sub>, (c) cracked Co-CuS<sub>x</sub> after the ultrasonic treatment

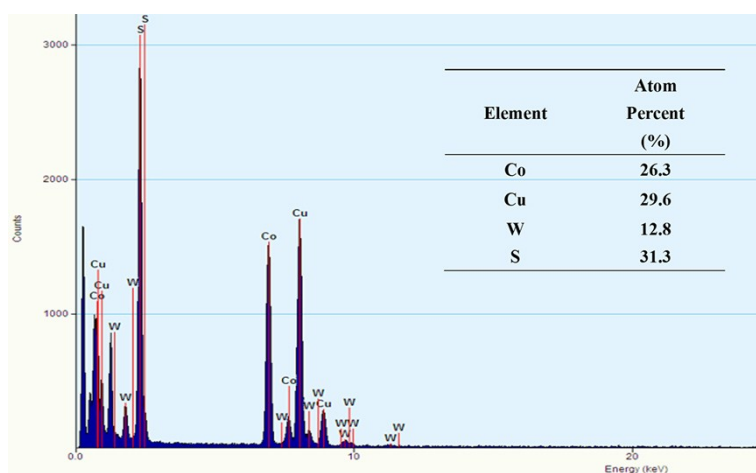

**Fig. S2.** EDX spectra images and main atom percent of Co-Cu-WS<sub>x</sub>.

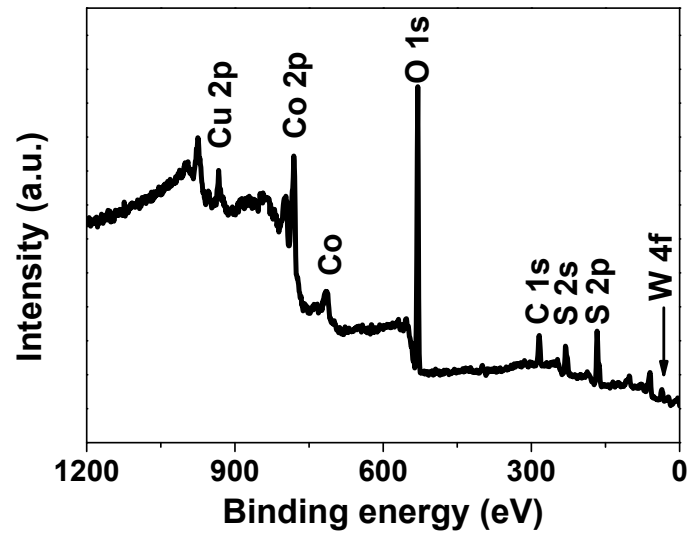

**Fig. S3.** XPS spectra of Co-Cu-WS<sub>x</sub> survey spectrum.

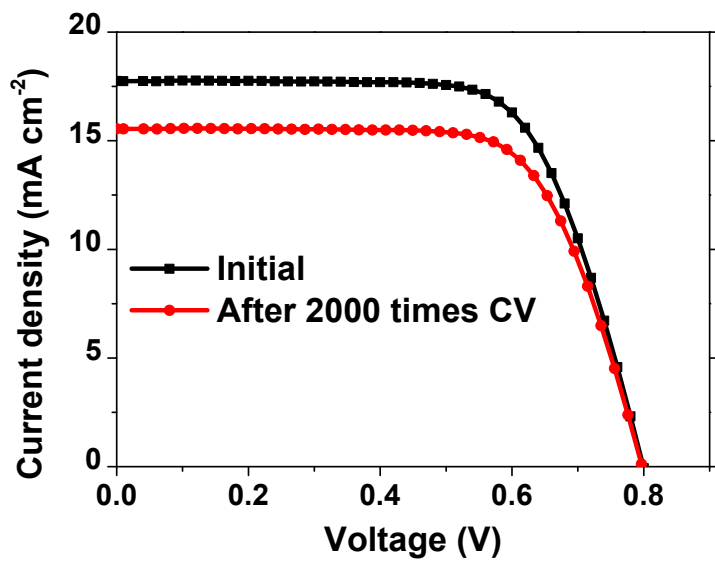

**Fig. S4.**  $J$ - $V$  curves of Co-Cu-WS<sub>x</sub> based CE before and after 2000 CV cycles.

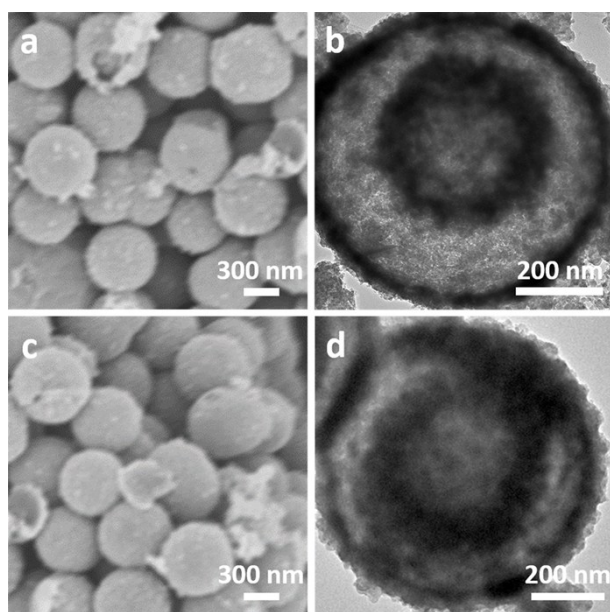

**Fig. S5.** (a, b) SEM/TEM images of Co-Cu-WS<sub>x</sub> after stability tests for DSSC. (c, d) SEM/TEM images of Co-Cu-WS<sub>x</sub> after stability tests for HER.

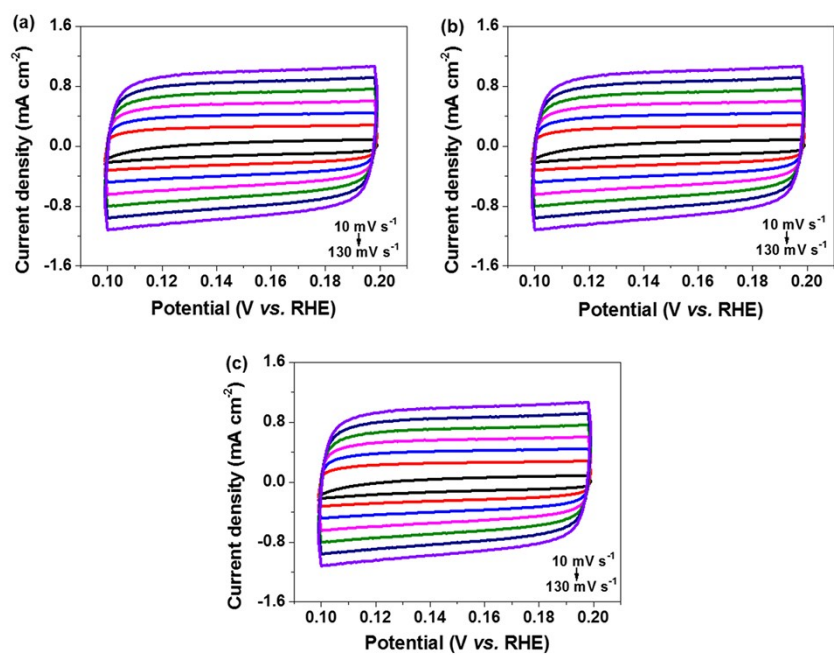

**Figure S6.** Cycle voltammograms of (a) Co-Cu-WS<sub>x</sub>, (b) Co-WS<sub>x</sub> and (c) Co-CuS<sub>x</sub> at different scan rates (10, 30, 50, 70, 90, 110 and 130 mV s<sup>-1</sup>) in 1.0 M KOH.



**Table S1.** Comparisons of DSSC performances for Co-Cu-WS<sub>x</sub> with other typical non-noble metal-based catalysts.

| Catalyst                                         | $\eta$ (%) | $\eta_{Pt}$ (%) | $\eta/\eta_{Pt}$ | Reference |
|--------------------------------------------------|------------|-----------------|------------------|-----------|
| Co-Cu-WS <sub>x</sub>                            | 9.61       | 8.24            | 1.17             | This work |
| CuS/WS <sub>2</sub>                              | 8.21       | 7.97            | 1.03             | 1         |
| Co <sub>3</sub> S <sub>4</sub> nanosheet/rGO     | 8.08       | 7.62            | 1.06             | 2         |
| WO <sub>x</sub> @WS <sub>2</sub> @carbon         | 7.71       | 7.34            | 1.05             | 3         |
| Co <sub>3</sub> S <sub>4</sub> /ECs              | 9.23       | 8.38            | 1.10             | 4         |
| MoS <sub>2</sub> /Co <sub>3</sub> S <sub>4</sub> | 6.77       | 7.14            | 0.95             | 5         |
| CoS on om-SnO <sub>2</sub>                       | 7.50       | 5.80            | 1.29             | 6         |
| carbon-coated WS <sub>2</sub>                    | 5.50       | 5.60            | 0.98             | 7         |
| WS <sub>2</sub> /MWCNTa                          | 7.36       | 7.54            | 0.98             | 8         |
| WS <sub>2</sub>                                  | 7.73       | 7.64            | 1.01             | 9         |

**Table S2.** Comparison of HER performance in alkaline medium for as-obtained samples with other non-noble metal-based catalysts.

| Catalyst                                                            | Onset potential (mV) | $\eta_{10}$ (mV) | Tafel slope (mV decade <sup>-1</sup> ) | Reference |
|---------------------------------------------------------------------|----------------------|------------------|----------------------------------------|-----------|
| Co-Cu-WS <sub>x</sub>                                               | 25.5                 | 82.5             | 53.8                                   | This work |
| Co <sub>3</sub> S <sub>4</sub> HNSs                                 | —                    | 221              | 111                                    | 10        |
| Co <sub>3</sub> S <sub>4</sub> /MoS <sub>2</sub> /Ni <sub>2</sub> P | 60                   | —                | 98                                     | 11        |
| Co <sub>3</sub> S <sub>4</sub> @MoS <sub>2</sub>                    | —                    | 136              | 74.                                    | 12        |
| MoS <sub>2</sub> /Co <sub>3</sub> S <sub>4</sub>                    | —                    | 225              | 115.3                                  | 13        |
| $\gamma$ -Cu <sub>2</sub> S/CF                                      | 105                  | 190              | 98.9                                   | 14        |
| NiO@Ni/WS <sub>2</sub> /CC                                          | 40                   | —                | 43                                     | 15        |
| Co <sub>3</sub> S <sub>4</sub> /CoP                                 | 38                   | 86               | 45                                     | 16        |
| NiS <sub>2</sub> /MoS <sub>2</sub> HNW                              | —                    | 204              | 65                                     | 17        |
| WS <sub>2</sub> /SNCF                                               | 96                   | 157              | 66                                     | 18        |

## References

- 1 S. Hussain, S. A. Patil, A. A. Memon, D. Vikraman, B. A. Naqvi, S. H. Jeong, H. S. Kim, H. S. Kim and J. Jung, *Sol. Energy*, 2018, **171**, 122–129.
- 2 T. T. Jiang, S. Y. Yang, P. Dai, X. X. Yu, Z. M. Bai, M. Z. Wu, G. Li and C. J. Tu, *Electrochim. Acta*, 2018, **261**, 143–150.
- 3 Z. F. Shen, M. W. Wang, L. H. Liu, M. V. Sofianos, H. G. Yang, S. B. Wang and S. M. Liu, *Electrochim. Acta*, 2018, **266**, 130–138.
- 4 L. Li, J. Y. Xiao, H. D. Sui, X. C. Yang, W. M. Zhang, X. W. Li, A. Hagfeldt and M. X. Wu, *J. Power Sources*, 2016, **326**, 6–13.
- 5 F. Y. Dong, Y. J. Guo, P. Xu, X. Yin, Y. G. Li and M. He, *Sci. China Mater.*, 2017, **60**, 295–303.
- 6 J. T. Park, C. S. Lee and J. H. Kim, *Nanoscale*, 2015, **7**, 670–678.
- 7 Y. Y. Wang, S. J. Li, Y. Bai, Z. Chen, Q. W. Jiang, T. Li and W. F. Zhang, *Electrochim. Acta*, 2013, **114**, 30–34.
- 8 J. Wu, G. Yue, Y. Xiao, M. Huang, J. Lin, L. Fan, Z. Lan and J. Y. Lin, *ACS Appl. Mater. Interfaces*, 2012, **4**, 6530–6536.
- 9 M. Wu, Y. Wang, X. Lin, N. Yu, L. Wang, L. Wang, A. Hagfeldt and T. Ma, *Phys. Chem. Chem. Phys.*, 2011, **13**, 19298–19301.
- 10 X. Ma, W. Zhang, Y. Deng, C. Zhong, W. Hu and X. Han, *Nanoscale*, 2018, **10**, 4816–4824.
- 11 H. Lin, H. Li, Y. Li, J. Liu, X. Wang and L. Wang, *J. Mater. Chem. A*, 2017, **5**, 25410–25419.
- 12 Y. N. Guo, J. Tang, Z. L. Wang, Y. M. Kang, Y. Bando and Y. Yamauchi, *Nano Energy*, 2018, **47**, 494–502.
- 13 X. Lei, K. Yu, H. L. Li and Z. Q. Zhu, *Electrochim. Acta*, 2018, **269**, 262–273.
- 14 M. H. Fan, R. Q. Gao, Y. C. Zou, D. J. Wang, N. Bai, G. D. Li and X. X. Zou, *Electrochim. Acta*, 2016, **215**, 366–373.
- 15 D. Wang, Q. Li, C. Han, Z. Xing and X. Yang, *ACS Cent. Sci.*, 2018, **4**, 112–119.
- 16 T. Wang, L. Wu, X. Xu, Y. Sun, Y. Wang, W. Zhong and Y. Du, *Sci. Rep.*, 2017, **7**,

11891.

17 P. Y. Kuang, T. Tong, K. Fan and J. G. Yu, *ACS Catal.*, 2017, **7**, 6179–6187.

18 Q. F. Wang, R. P. Yanzhang, X. N. Ren, H. Zhu, M. Zhang and M. L. Du, *Int. J. Hydrogen Energy*, 2016, **41**, 21870–21882.
